# Supplementary material for: Theoretical investigations on the structures and electronic and optical properties of neutral and anionic M2-doped B24clusters (M = Li, Na, and K)
Source: Royal Society of Chemistry journal article supplement (doi:10.1039/d3nj00041a), 2023-01-01
Supplement: d3nj00041a1.pdf [file d3nj00041a1.pdf]

## Electronic Supporting Information

### **Theoretical investigations on the structures, electronic and optical properties of neutral and anionic $M_2$ -doped $B_{24}$ clusters ( $M=Li, Na, K$ )**

Cheng-Gang Li<sup>1,2</sup>, Ying-Qi Cui<sup>1,\*</sup>, Hao Tian<sup>1</sup>, Zi-Gang Shen<sup>3</sup>, Qin-Qin Shao<sup>1</sup>, Yan-Li Ding<sup>1</sup>, Bao-Zeng Ren<sup>2</sup>

<sup>1</sup> *School of Physics and Electronic Engineering, Zhengzhou Normal University, Zhengzhou 450044, China*

<sup>2</sup> *School of Chemical Engineering, Zhengzhou University, Zhengzhou 450001, China*

<sup>3</sup> *Academic Affairs office, Zhengzhou Normal University, Zhengzhou 450044, China*

\*Correspondence to: Ying-Qi Cui, School of Physics and Electronic Engineering, Zhengzhou Normal University, Zhengzhou 450044, China

**Table S1** Cartesian coordinates for the lowest energy structures of  $M_2B_{24}^{0/-}$  (M=Li, Na, K) clusters.Li<sub>2</sub>B<sub>24</sub>

0 1

|    |             |             |             |
|----|-------------|-------------|-------------|
| B  | 0.80335100  | 1.93946200  | 1.49262800  |
| B  | -0.80335100 | 1.93946200  | 1.49262800  |
| B  | -1.93946200 | 0.80335100  | 1.49262800  |
| B  | -1.93946200 | -0.80335100 | 1.49262800  |
| B  | -0.80335100 | -1.93946200 | 1.49262800  |
| B  | 0.80335100  | -1.93946200 | 1.49262800  |
| B  | 1.93946200  | -0.80335100 | 1.49262800  |
| B  | 1.93946200  | 0.80335100  | 1.49262800  |
| B  | 0.80335100  | 1.93946200  | -1.49262800 |
| B  | 1.93946200  | 0.80335100  | -1.49262800 |
| B  | 1.93946200  | -0.80335100 | -1.49262800 |
| B  | 0.80335100  | -1.93946200 | -1.49262800 |
| B  | -0.80335100 | -1.93946200 | -1.49262800 |
| B  | -1.93946200 | -0.80335100 | -1.49262800 |
| B  | -1.93946200 | 0.80335100  | -1.49262800 |
| B  | -0.80335100 | 1.93946200  | -1.49262800 |
| B  | 0.00000000  | 2.22563500  | 0.00000000  |
| B  | -1.57376200 | 1.57376200  | 0.00000000  |
| B  | -2.22563500 | 0.00000000  | 0.00000000  |
| B  | -1.57376200 | -1.57376200 | 0.00000000  |
| B  | 0.00000000  | -2.22563500 | 0.00000000  |
| B  | 1.57376200  | -1.57376200 | 0.00000000  |
| B  | 2.22563500  | 0.00000000  | 0.00000000  |
| B  | 1.57376200  | 1.57376200  | 0.00000000  |
| Li | 0.00000000  | 0.00000000  | 2.55459300  |
| Li | 0.00000000  | 0.00000000  | -2.55459300 |

Na<sub>2</sub>B<sub>24</sub>

0 1

|   |             |             |             |
|---|-------------|-------------|-------------|
| B | 1.93945200  | 0.80335100  | 1.49083600  |
| B | 0.80335100  | 1.93945200  | 1.49083600  |
| B | -0.80335100 | 1.93945200  | 1.49083600  |
| B | -1.93945200 | 0.80335100  | 1.49083600  |
| B | -1.93945200 | -0.80335100 | 1.49083600  |
| B | -0.80335100 | -1.93945200 | 1.49083600  |
| B | 0.80335100  | -1.93945200 | 1.49083600  |
| B | 1.93945200  | -0.80335100 | 1.49083600  |
| B | 1.93945200  | 0.80335100  | -1.49083600 |

|    |             |             |             |
|----|-------------|-------------|-------------|
| B  | 1.93945200  | -0.80335100 | -1.49083600 |
| B  | 0.80335100  | -1.93945200 | -1.49083600 |
| B  | -0.80335100 | -1.93945200 | -1.49083600 |
| B  | -1.93945200 | -0.80335100 | -1.49083600 |
| B  | -1.93945200 | 0.80335100  | -1.49083600 |
| B  | -0.80335100 | 1.93945200  | -1.49083600 |
| B  | 0.80335100  | 1.93945200  | -1.49083600 |
| B  | 1.57636800  | 1.57636800  | 0.00000000  |
| B  | 0.00000000  | 2.22930300  | 0.00000000  |
| B  | -1.57636800 | 1.57636800  | 0.00000000  |
| B  | -2.22930300 | 0.00000000  | 0.00000000  |
| B  | -1.57636800 | -1.57636800 | 0.00000000  |
| B  | 0.00000000  | -2.22930300 | 0.00000000  |
| B  | 1.57636800  | -1.57636800 | 0.00000000  |
| B  | 2.22930300  | 0.00000000  | 0.00000000  |
| Na | 0.00000000  | 0.00000000  | 3.16963500  |
| Na | 0.00000000  | 0.00000000  | -3.16963500 |

$K_2B_{24}$

0 1

|   |             |             |             |
|---|-------------|-------------|-------------|
| B | 1.93755500  | 0.80252600  | 1.49168400  |
| B | 0.80252600  | 1.93755500  | 1.49168400  |
| B | -0.80252600 | 1.93755500  | 1.49168400  |
| B | -1.93755500 | 0.80252600  | 1.49168400  |
| B | -1.93755500 | -0.80252600 | 1.49168400  |
| B | -0.80252600 | -1.93755500 | 1.49168400  |
| B | 0.80252600  | -1.93755500 | 1.49168400  |
| B | 1.93755500  | -0.80252600 | 1.49168400  |
| B | 1.93755500  | 0.80252600  | -1.49168400 |
| B | 1.93755500  | -0.80252600 | -1.49168400 |
| B | 0.80252600  | -1.93755500 | -1.49168400 |
| B | -0.80252600 | -1.93755500 | -1.49168400 |
| B | -1.93755500 | -0.80252600 | -1.49168400 |
| B | -1.93755500 | 0.80252600  | -1.49168400 |
| B | -0.80252600 | 1.93755500  | -1.49168400 |
| B | 0.80252600  | 1.93755500  | -1.49168400 |
| B | 1.57734100  | 1.57734100  | 0.00000000  |
| B | 0.00000000  | 2.23064100  | 0.00000000  |
| B | -1.57734100 | 1.57734100  | 0.00000000  |
| B | -2.23064100 | 0.00000000  | 0.00000000  |
| B | -1.57734100 | -1.57734100 | 0.00000000  |
| B | 0.00000000  | -2.23064100 | 0.00000000  |
| B | 1.57734100  | -1.57734100 | 0.00000000  |

|   |            |            |             |
|---|------------|------------|-------------|
| B | 2.23064100 | 0.00000000 | 0.00000000  |
| K | 0.00000000 | 0.00000000 | 3.64319400  |
| K | 0.00000000 | 0.00000000 | -3.64319400 |

Li<sub>2</sub>B<sub>24</sub><sup>-</sup>

-1 2

|    |              |              |              |
|----|--------------|--------------|--------------|
| B  | 0.068110000  | 0.203771000  | -1.553902000 |
| B  | -1.329026000 | 0.806732000  | -1.004834000 |
| B  | 1.546317000  | 0.431178000  | -0.863027000 |
| B  | 0.217625000  | 1.690435000  | -0.805795000 |
| B  | 0.885102000  | -1.151768000 | -1.213843000 |
| B  | -0.864971000 | -0.033113000 | 1.774034000  |
| B  | 1.268017000  | -1.511327000 | 0.739700000  |
| B  | 0.740861000  | -0.359044000 | 1.788010000  |
| B  | -0.350297000 | -1.580381000 | 1.304978000  |
| B  | -1.814481000 | 0.846928000  | 0.857479000  |
| B  | -1.854288000 | -0.942026000 | 0.832574000  |
| B  | 2.047185000  | 0.062044000  | 0.995918000  |
| Li | 0.249382000  | 1.825007000  | 1.781149000  |
| B  | 0.197068000  | -2.599157000 | -0.224692000 |
| Li | -1.318907000 | -1.355147000 | -1.917904000 |
| B  | -1.405489000 | -2.440446000 | 0.102550000  |
| B  | -2.878808000 | -0.107635000 | -0.436278000 |
| B  | 2.589200000  | -1.168430000 | -0.464324000 |
| B  | -1.554797000 | 2.424287000  | -0.203506000 |
| B  | 2.516746000  | 1.641691000  | 0.040229000  |
| B  | 1.332627000  | 2.762839000  | 0.023301000  |
| B  | -0.123330000 | 3.155128000  | -0.025260000 |
| B  | 1.738583000  | -2.517004000 | -0.594467000 |
| B  | -2.741963000 | -1.705808000 | -0.312960000 |
| B  | -2.808402000 | 1.496860000  | -0.396176000 |
| B  | 3.220125000  | 0.312328000  | -0.277653000 |

Na<sub>2</sub>B<sub>24</sub><sup>-</sup>

-1 2

|   |            |             |             |
|---|------------|-------------|-------------|
| B | 0.69393600 | 1.57006900  | 2.49121900  |
| B | 0.58264800 | 2.85498200  | 1.51784200  |
| B | 0.50331500 | 3.40573900  | 0.00000000  |
| B | 0.58264800 | 2.85498200  | -1.51784200 |
| B | 0.69393600 | 1.57006900  | -2.49121900 |
| B | 0.75318500 | 0.02107300  | -2.93002100 |
| B | 0.78247900 | -1.57774200 | -2.68138400 |
| B | 0.90276900 | -2.74571200 | -1.56374700 |

|    |             |             |             |
|----|-------------|-------------|-------------|
| B  | 0.95746400  | -3.14474000 | 0.00000000  |
| B  | 0.90276900  | -2.74571200 | 1.56374700  |
| B  | 0.78247900  | -1.57774200 | 2.68138400  |
| B  | 0.75318500  | 0.02107300  | 2.93002100  |
| B  | -0.83164500 | 2.25211600  | 2.21762300  |
| B  | -0.93696400 | 3.04997400  | 0.80215600  |
| B  | -0.93696400 | 3.04997400  | -0.80215600 |
| B  | -0.83164500 | 2.25211600  | -2.21762300 |
| B  | -0.75237400 | 0.80659900  | -2.92448800 |
| B  | -0.72568200 | -0.81207600 | -2.76985700 |
| B  | -0.63808700 | -2.25193500 | -2.07428600 |
| B  | -0.51850300 | -3.26120500 | -0.80442200 |
| B  | -0.51850300 | -3.26120500 | 0.80442200  |
| B  | -0.63808700 | -2.25193500 | 2.07428600  |
| B  | -0.72568200 | -0.81207600 | 2.76985700  |
| B  | -0.75237400 | 0.80659900  | 2.92448800  |
| Na | 1.71445500  | 0.82564800  | 0.00000000  |
| Na | -1.75277500 | -0.85895900 | 0.00000000  |

$K_2B_{24}^-$

-1 2

|   |             |             |             |
|---|-------------|-------------|-------------|
| K | 0.00000000  | 0.00000000  | -1.93856000 |
| K | 0.00000000  | 0.00000000  | 1.95291100  |
| B | 0.00000000  | 3.20987900  | -0.70074100 |
| B | -2.63047500 | 1.51870500  | -0.77164000 |
| B | -2.77983700 | -1.60494000 | -0.70074100 |
| B | 0.00000000  | -3.03741100 | -0.77164000 |
| B | 2.77983700  | -1.60494000 | -0.70074100 |
| B | 2.63047500  | 1.51870500  | -0.77164000 |
| B | -0.80408500 | -3.07992000 | 0.71220200  |
| B | -2.95489400 | -0.78259500 | 0.76029500  |
| B | -2.26524600 | 2.23631800  | 0.71220200  |
| B | 0.79970000  | 2.95031000  | 0.76029500  |
| B | 3.06933200  | 0.84360200  | 0.71220200  |
| B | 2.15519400  | -2.16771600 | 0.76029500  |
| B | 0.80408500  | -3.07992000 | 0.71220200  |
| B | 2.95489400  | -0.78259500 | 0.76029500  |
| B | 2.26524600  | 2.23631800  | 0.71220200  |
| B | -0.79970000 | 2.95031000  | 0.76029500  |
| B | -3.06933200 | 0.84360200  | 0.71220200  |
| B | -2.15519400 | -2.16771600 | 0.76029500  |
| B | 1.53967000  | 2.70644400  | -0.74539400 |
| B | 3.11368400  | -0.01982800 | -0.74539400 |

|   |             |             |             |
|---|-------------|-------------|-------------|
| B | 1.57401400  | -2.68661600 | -0.74539400 |
| B | -1.57401400 | -2.68661600 | -0.74539400 |
| B | -3.11368400 | -0.01982800 | -0.74539400 |
| B | -1.53967000 | 2.70644400  | -0.74539400 |

**Table S2** Theoretical vertical detachment energy (VDE) for the lowest and low-lying energy structures of  $M_2B_{24}^-$  (M=Li, Na, K) clusters

|         | $Li_2B_{24}^-$ |      |      | $Na_2B_{24}^-$ |      |      | $K_2B_{24}^-$ |      |      |
|---------|----------------|------|------|----------------|------|------|---------------|------|------|
|         | 1a             | 2a   | 3a   | 1a             | 2a   | 3a   | 1a            | 2a   | 3a   |
| VDE(eV) | 2.45           | 1.68 | 2.50 | 2.57           | 2.02 | 2.54 | 2.44          | 2.75 | 2.22 |

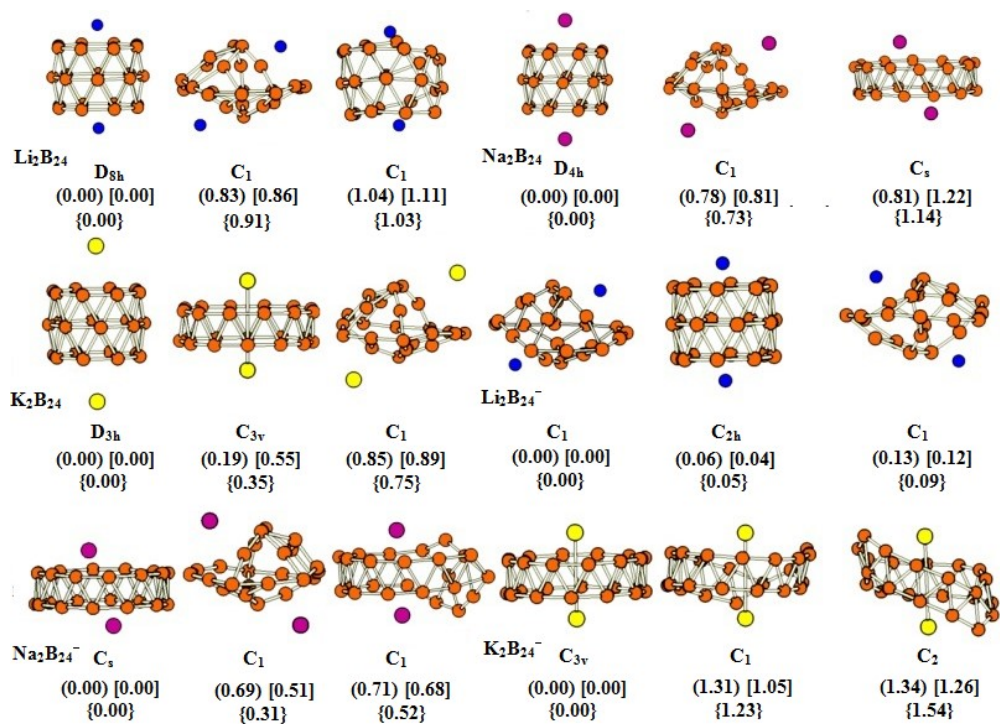

**Figure S1** Geometrical structures of the lowest and low-lying isomers of  $\text{M}_2\text{B}_{24}^{0/-}$  ( $\text{M}=\text{Li}, \text{Na}, \text{K}$ ) clusters at PBE0/6-311+G(d) (in parentheses), PBE0-D3/6-311+G(d) (in square brackets) and CCSD(T)/def2-TZVP//PBE0/6-311+G(d) (in braces) levels along with the point group symmetry, and relative energy (eV). The orange, blue, pink and yellow balls are B, Li, Na and K atoms, respectively.



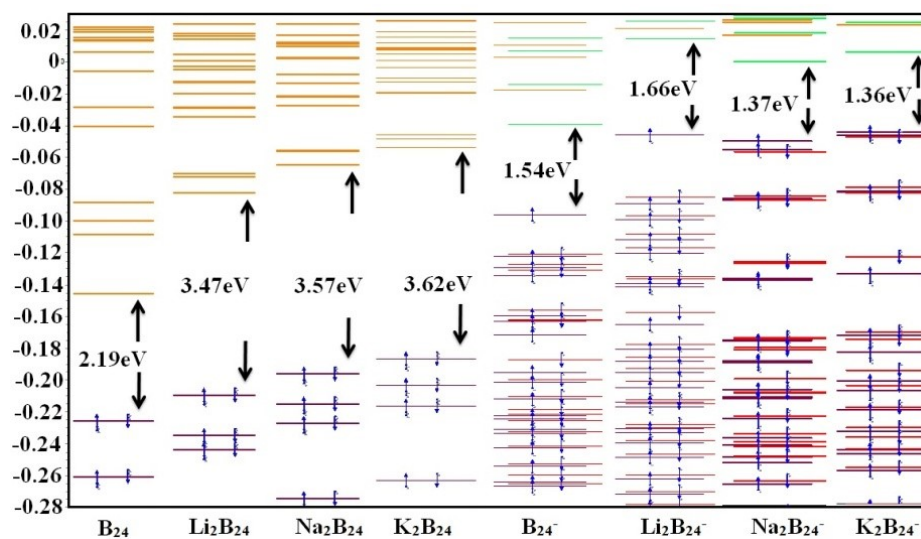

**Figure S2** Molecular orbital energy levels of the lowest energy structures of  $M_2B_{24}^{0/-}$  (M=Li, Na, K) clusters

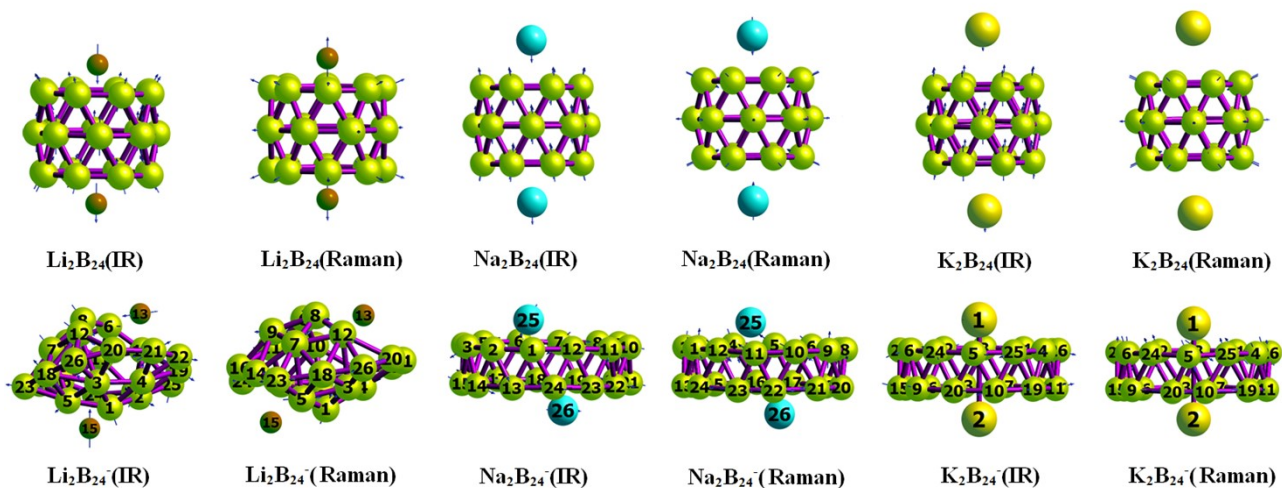

**Figure S3** The vibrational modes of strongest peaks for the lowest energy structures of  $M_2B_{24}^{0-}$  ( $M=Li, Na, K$ ) clusters.
